# Supplementary material for: Residential Nitrogen Dioxide Exposure and Cause-Specific Cerebrovascular Mortality: An Individual-Level, Case-Crossover Study
Source: MDPI journal article supplement (doi:10.3390/toxics12010010), 2023-12-22
Supplement: s1 [file s1]

## **Supplemental Material**

### **Contents**

**Figure S1.** The lag structure for percent changes of cerebrovascular mortality associated with a 10  $\mu\text{g}/\text{m}^3$  increase in  $\text{NO}_2$  over lag 0 to 14 days.

**Figure S2.** The cumulative exposure-response curves for the relationships between daily concentrations ( $\mu\text{g}/\text{m}^3$ ) of  $\text{NO}_2$  and cerebrovascular mortality in subgroups over 0 to 7 days.

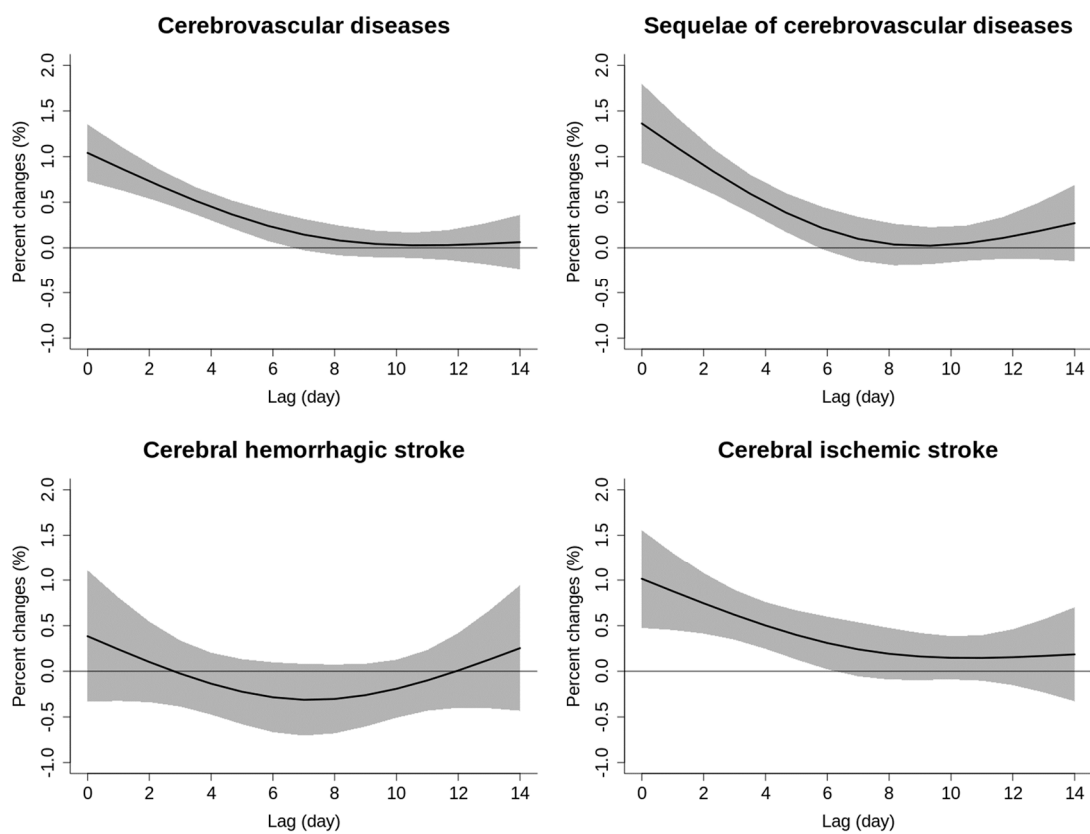

**Figure S1.** The lag structure for percent changes of cerebrovascular mortality associated with a  $10 \mu\text{g}/\text{m}^3$  increase in  $\text{NO}_2$  over lag 0 to 14 days.

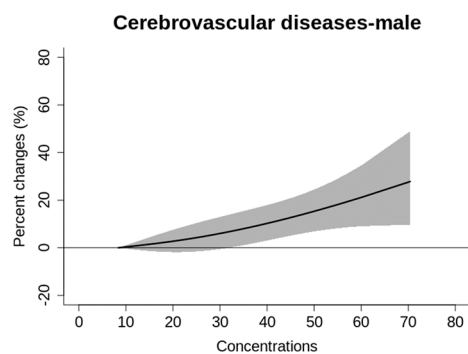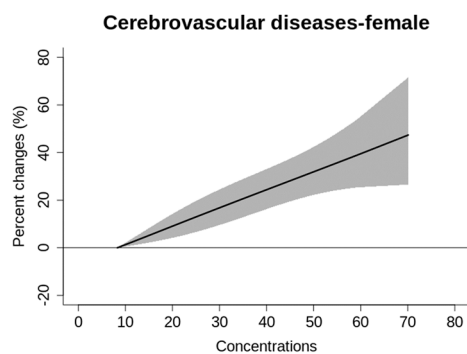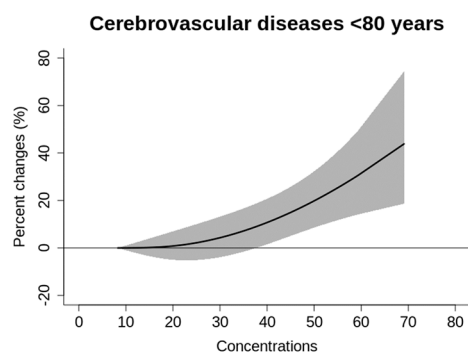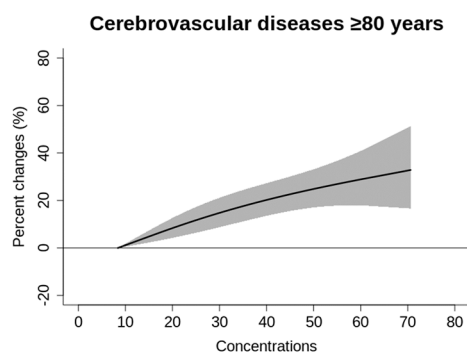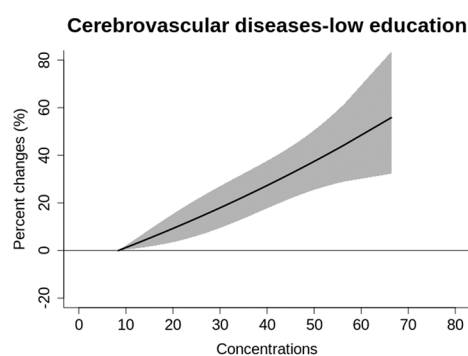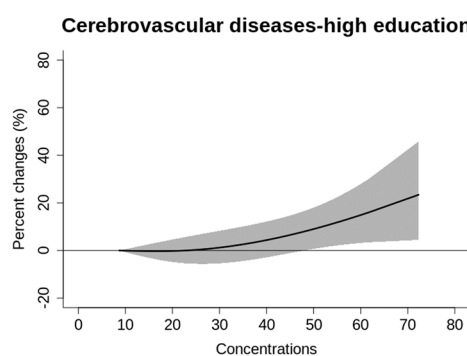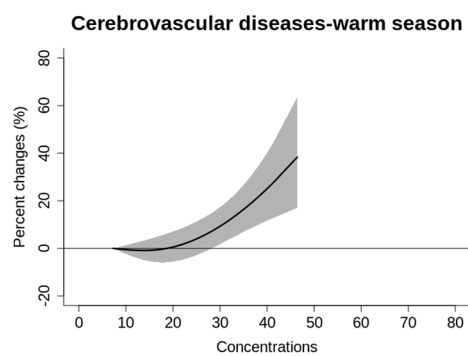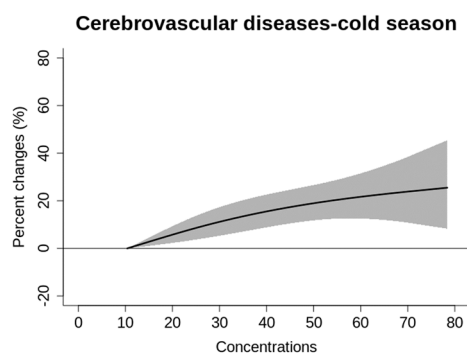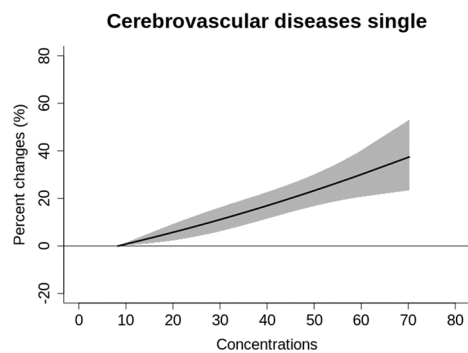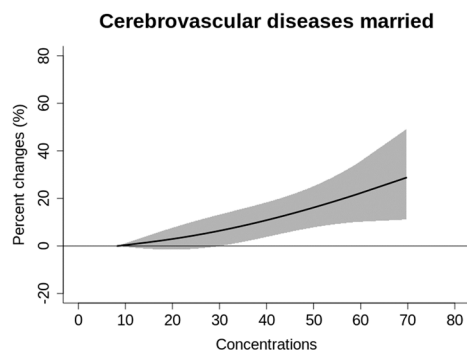

**Figure S2.** The cumulative exposure-response curves for the relationships between daily concentrations ( $\mu\text{g}/\text{m}^3$ ) of  $\text{NO}_2$  and cerebrovascular mortality in subgroups over 0 to 7 days.
